# Supplementary material
Source: PubMed Central journal article supplement (PMC7616947)
Supplement: EMS116083-supplement-Supplementary_Material.pdf [file EMS116083-supplement-Supplementary_Material.pdf]

Supplementary Figure 1: Allocation of patients to RADICALS comparisons

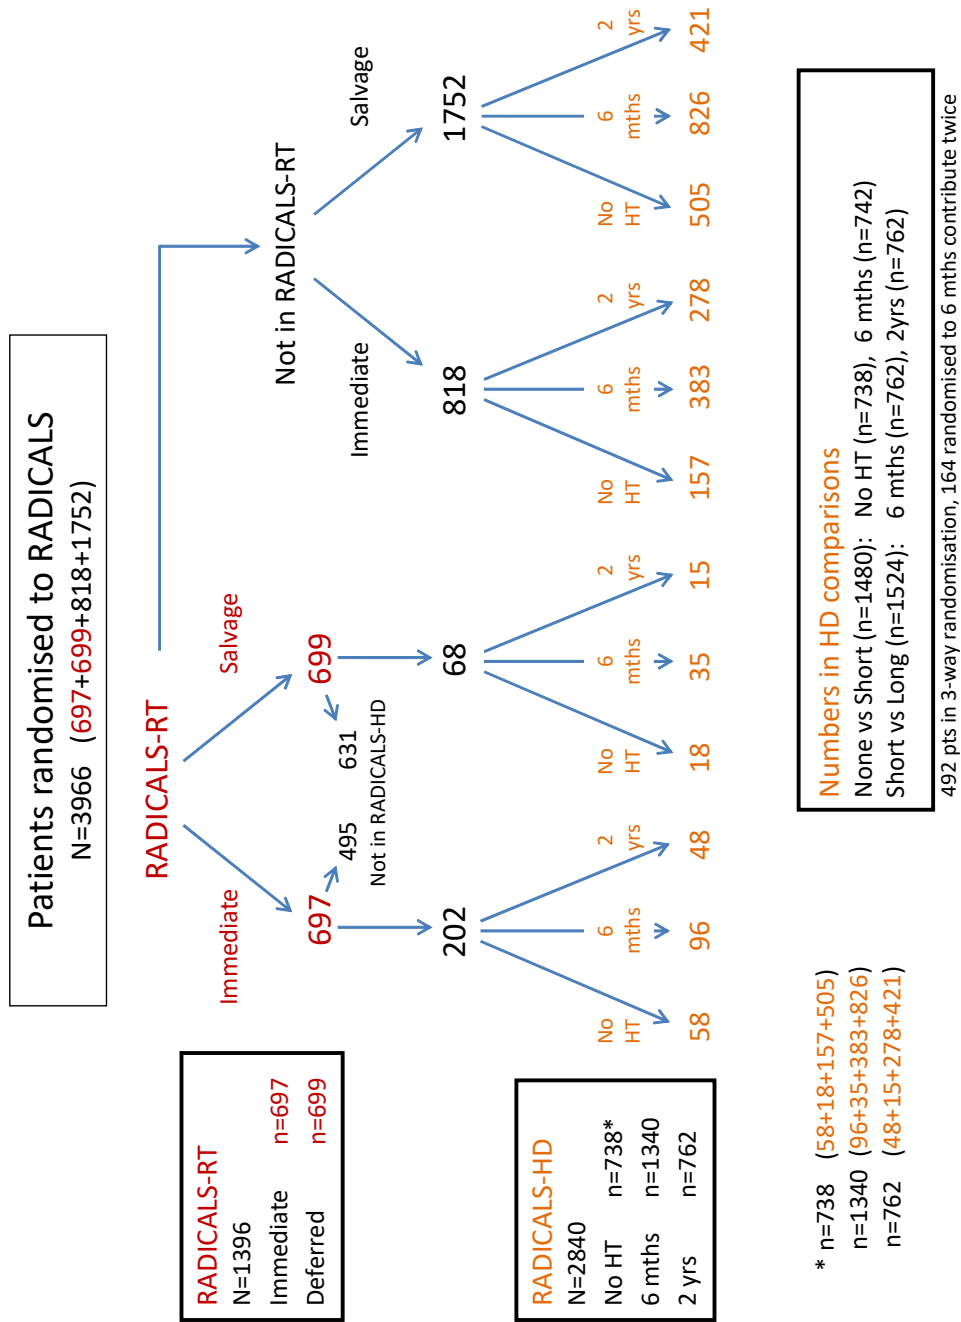

\* n=738 (58+18+157+505)  
n=1340 (96+35+383+826)  
n=762 (48+15+278+421)

### Supplementary Figure 2: Combinations of baseline characteristics of all patients

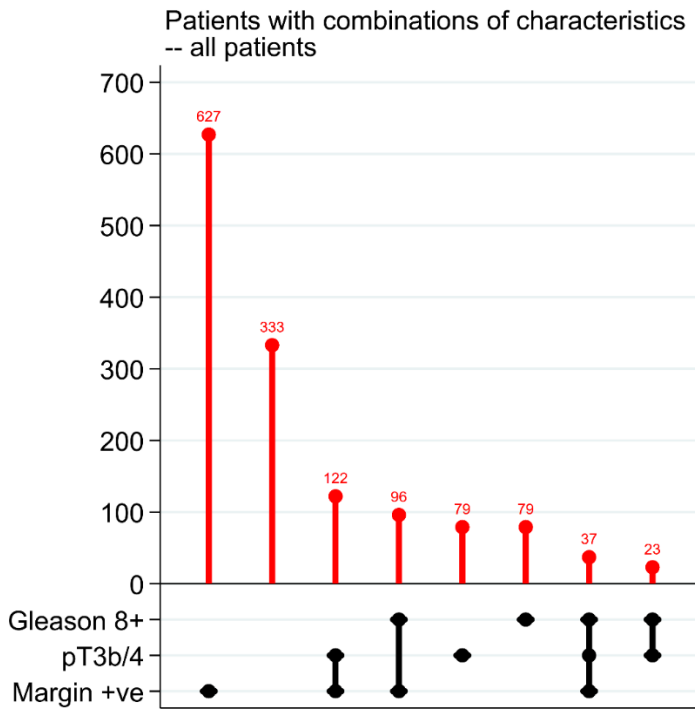

### Supplementary Figure 3: Combinations of baseline characteristics of patients by treatment allocation

Patients with combinations of characteristics  
-- by treatment

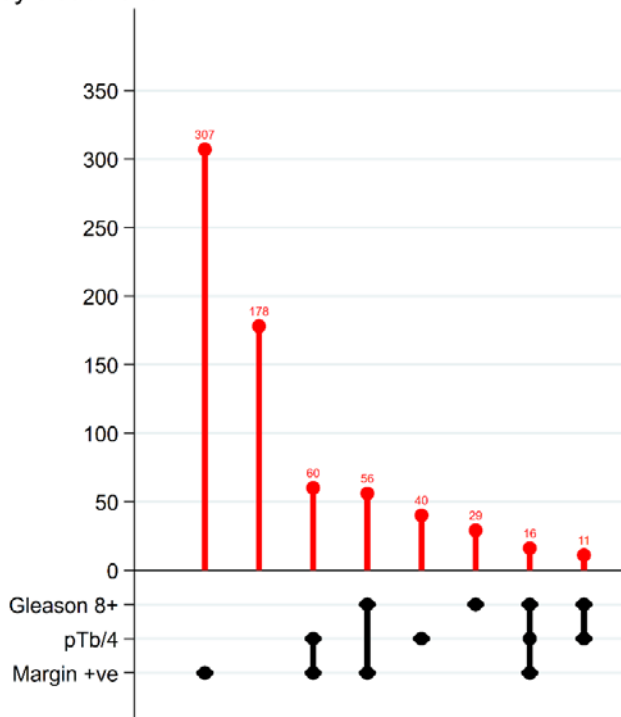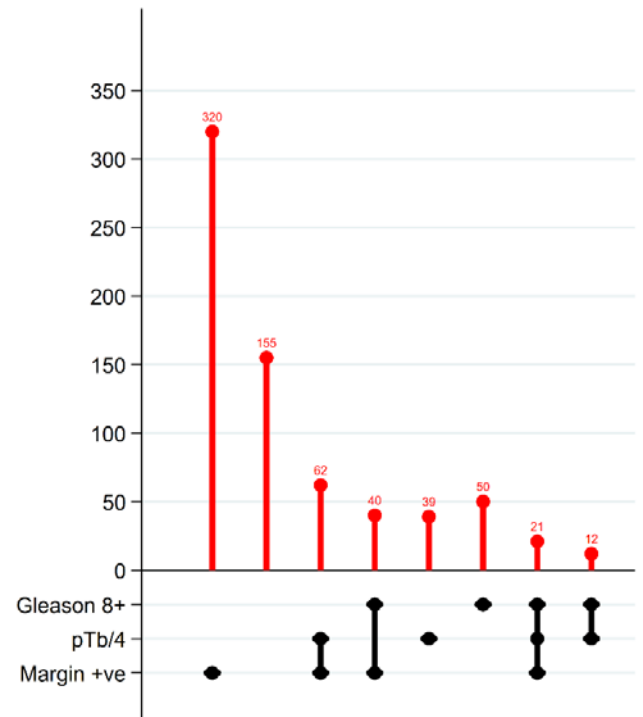

**Supplementary Figure 4: Time to Starting Radiotherapy**

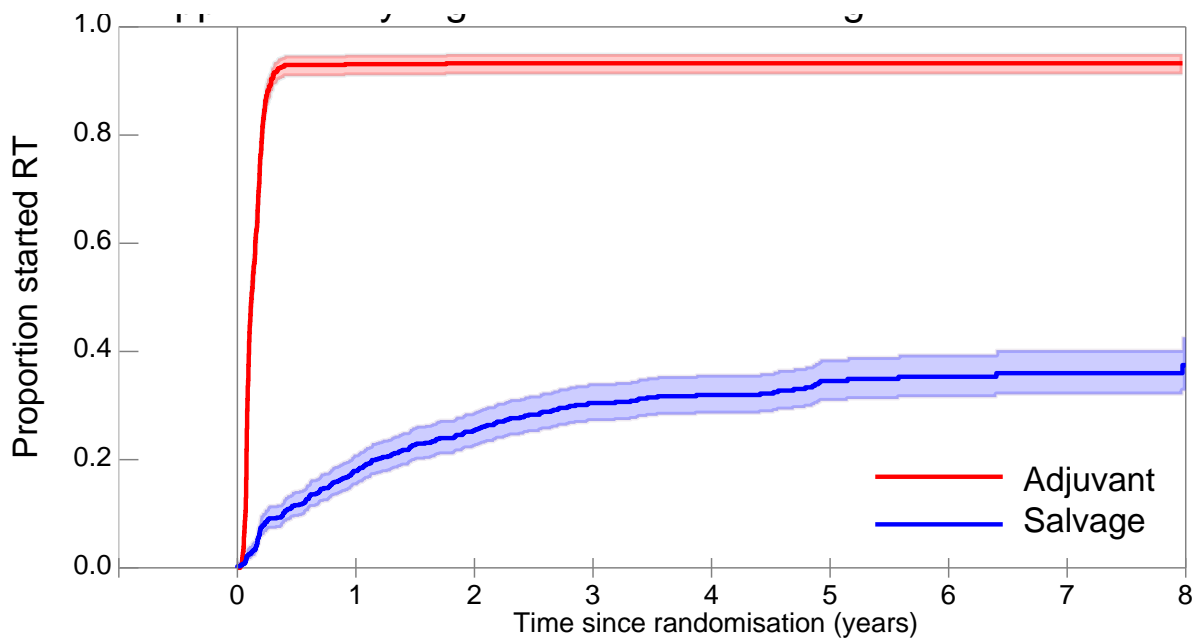

|                 | 0   | 1   | 2   | 3   | 4   | 5   | 6   | 7   | 8   |
|-----------------|-----|-----|-----|-----|-----|-----|-----|-----|-----|
| <b>Adjuvant</b> |     |     |     |     |     |     |     |     |     |
| At-risk         | 697 | 46  | 39  | 29  | 23  | 17  | 15  | 14  | 0   |
| Censored        | 0   | 3   | 9   | 19  | 25  | 31  | 33  | 34  | 48  |
| RT start        | 0   | 648 | 649 | 649 | 649 | 649 | 649 | 649 | 649 |
| <b>Salvage</b>  |     |     |     |     |     |     |     |     |     |
| At-risk         | 699 | 571 | 491 | 375 | 289 | 210 | 143 | 86  | 37  |
| Censored        | 0   | 3   | 31  | 117 | 196 | 266 | 331 | 387 | 435 |
| RT start        | 0   | 125 | 177 | 207 | 214 | 223 | 225 | 226 | 227 |

**Supplementary Table 1: Listing of Serious Adverse Events**

| Event                                         | Salvage RT | Adjuvant RT | All |
|-----------------------------------------------|------------|-------------|-----|
| Urinary retention                             | 0          | 5           | 5   |
| Haematuria                                    | 2          | 2           | 4   |
| Urethral stricture                            | 0          | 3           | 3   |
| Chest pain                                    | 0          | 2           | 2   |
| Dehydration                                   | 2          | 0           | 2   |
| Myocardial infarction                         | 2          | 0           | 2   |
| Rectal haemorrhage                            | 1          | 1           | 2   |
| Abdominal pain                                | 1          | 0           | 1   |
| Angina                                        | 1          | 0           | 1   |
| Blindness, left eye                           | 0          | 1           | 1   |
| Cholecystitis                                 | 0          | 1           | 1   |
| Collapse                                      | 1          | 0           | 1   |
| Crushed vertebra                              | 0          | 1           | 1   |
| Cut to hand                                   | 1          | 0           | 1   |
| G.I. Diverticulitis                           | 0          | 1           | 1   |
| GU Haemorrhage                                | 0          | 1           | 1   |
| Hypotension                                   | 1          | 0           | 1   |
| Infective COPD                                | 0          | 1           | 1   |
| Ischaemic colitis                             | 0          | 1           | 1   |
| Laparoscopic enucleation of pancreatic tumour | 0          | 1           | 1   |
| Light headedness                              | 0          | 1           | 1   |
| Malignant melanoma                            | 0          | 1           | 1   |
| Overdose                                      | 0          | 1           | 1   |
| Palpitations                                  | 0          | 1           | 1   |
| Pancreatitis                                  | 0          | 1           | 1   |
| Pneumonitis                                   | 0          | 1           | 1   |
| Pyelonephritis                                | 1          | 0           | 1   |
| Shortness of breath                           | 0          | 1           | 1   |
| Small Cell Lung Cancer                        | 0          | 1           | 1   |
| Treatment Induced AML                         | 0          | 1           | 1   |
| Respiratory failure                           | 0          | 1           | 1   |
| Venous thrombotic episode                     | 0          | 1           | 1   |
| Vein injury                                   | 0          | 1           | 1   |
| Total                                         | 13         | 33          | 46  |

**Supplementary Table 2: International Continence Society Male Short Form (ICSMaleSF) at randomisation (post-prostatectomy)**

|                  | Qu7, Does urine leak before you can get to the toilet? |                   |      | Qu8, Does urine leak when you cough or sneeze? |                   |      | Qu9, Does urine leak for no obvious reason? |                   |      | Qu11, Had slight wetting of pants a few minutes after urinating? |                   |      |
|------------------|--------------------------------------------------------|-------------------|------|------------------------------------------------|-------------------|------|---------------------------------------------|-------------------|------|------------------------------------------------------------------|-------------------|------|
|                  | Salvage<br>n=544                                       | Adjuvant<br>n=518 | p*   | Salvage<br>n=542                               | Adjuvant<br>n=518 | p    | Salvage<br>n=544                            | Adjuvant<br>n=516 | p    | Salvage<br>n=540                                                 | Adjuvant<br>n=516 | p    |
| Never            | 134(25%)                                               | 133(26%)          | 0.47 | 109(20%)                                       | 101(20%)          | 0.78 | 230(42%)                                    | 214(41%)          | 0.22 | 201(37%)                                                         | 183(35%)          | 0.88 |
| Occasionally     | 247(45%)                                               | 236(46%)          |      | 225(42%)                                       | 215(42%)          |      | 173(32%)                                    | 179(35%)          |      | 235(44%)                                                         | 227(44%)          |      |
| Sometimes        | 109(20%)                                               | 110(21%)          |      | 107(20%)                                       | 109(21%)          |      | 95(17%)                                     | 94(18%)           |      | 71(13%)                                                          | 78(15%)           |      |
| Most of the time | 35(6%)                                                 | 30(6%)            |      | 59(11%)                                        | 62(12%)           |      | 26(5%)                                      | 21(4%)            |      | 24(4%)                                                           | 21(4%)            |      |
| All of the time  | 19(3%)                                                 | 9(2%)             |      | 42(8%)                                         | 31(6%)            |      | 20(4%)                                      | 8(2%)             |      | 9(2%)                                                            | 7(1%)             |      |

\* Chi-square test

**Supplementary Table 3: Subgroup analysis of bPFS, by CAPRA-S risk group**

| CAPRA-S score                                        | Salvage         | Adjuvant        | HR (95%CI) for adjuvant treatment | p    |
|------------------------------------------------------|-----------------|-----------------|-----------------------------------|------|
| Intermediate risk (3-5)<br>N<br>bPFS event, n<br>(%) | 384<br>33 (9%)  | 382<br>39 (10%) | 1.13 (0.70 to 1.81)               | 0.62 |
| High risk (6+)<br>N<br>bPFS event, n<br>(%)          | 257<br>45 (18%) | 260<br>48 (18%) | 1.00 (0.66 to 1.52)               | 1.0  |
